# Supplementary material
Source: publisher figshare collection journal article supplement (https://acs.figshare.com/ndownloader/files/23820728)
Supplement: Supplementary file 1 [file 23820728]

# **Catalytic Mechanism and Product Specificities of Protein Arginine Methyltransferase PRMT7: A Study from QM/MM molecular dynamics and free energy simulations**

Wan-Sheng Ren<sup>‡,1</sup>, Kai-Bin Jiang<sup>‡,1,‡</sup>, Hao Deng<sup>1</sup>, Nan Lu<sup>1</sup>, Tao Yu<sup>\*,2</sup>, Hong Guo<sup>\*,3</sup>,  
Ping Qian<sup>\*,1</sup>

<sup>1</sup> *Chemistry and Material Science Faculty, Shandong Agricultural University, Taian 271018, P. R. China*

<sup>2</sup> *Department of Chemistry, University of North Dakota, Grand Forks, ND 58202-9024, United States*

<sup>3</sup> *Department of Biochemistry and Cellular and Molecular Biology, University of Tennessee, Knoxville, TN 37996, United States UT/ORNL Center for Molecular Biophysics, Oak Ridge National Laboratory, Oak Ridge, TN 37830, United States*

<sup>‡</sup> These authors contributed equally to this work.

<sup>‡</sup> Current Address: State Key Laboratory of Structural Chemistry, Fujian Institute of Research on the Structure of Matter, Chinese Academy of Sciences, 350002, P. R. China.

\* Corresponding authors: Tel.: +86 538 8241175; fax: +86 538 8242251.

E-mail address: [qianp@sdau.edu.cn](mailto:qianp@sdau.edu.cn) (to P. Qian), [hguo1@utk.edu](mailto:hguo1@utk.edu) (to H. Guo) and [tao.yu.1@und.edu](mailto:tao.yu.1@und.edu) (to T. Yu)

## **Supporting Information**

Comparison of potential energy curves for the methyl transfer calculated from DFTB3, MP2/6-31G(d) and MP2/6-31G(d,p) in simplified cluster models

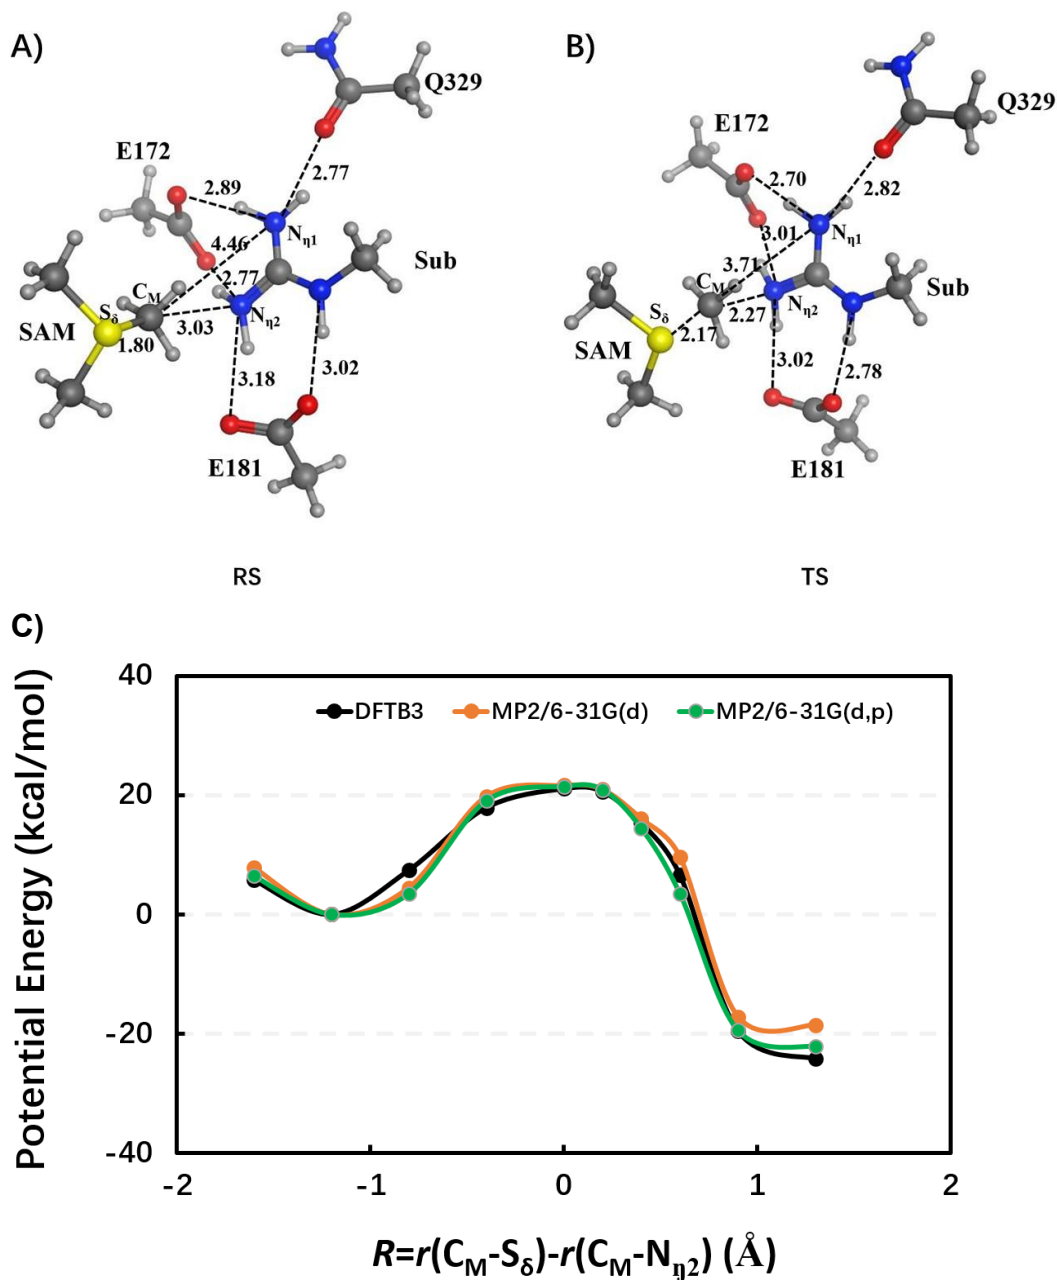

**Figure S1.** (A) The cluster model system for the reaction state (RS) of wild-type PRMT7 used for comparison the results of potential energy calculations from DFTB3, MP2/6-31G(d) and MP2/6-31G(d,p) calculations. The methyl group was transferred from the S<sub>δ</sub>-atom to the guanidine N<sub>η2</sub>-atom. (B) The structure near transition state (TS) for the methyl transfer. (C) Comparison of potential energy curves for the methyl transfer calculated from DFTB3, MP2/6-31G(d) and MP2/6-31G(d,p), respectively.

**Comparison of the Mulliken charge distributions from the DFTB3/CHARMM calculations for guanidino group in wild-type PRMT7 and three mutants (E172Q, E181Q, Q329A) as well as Mulliken charge distributions from the HF/STO-3G calculations for guanidino group in four corresponding models**

**Table S1.** Comparison of the Mulliken charge distributions (unit: e) of guanidino group in wild-type PRMT7 and three mutants based on the DFTB3/CHARMM calculations using typical structures of the wild-type and mutated enzymes obtained from the QM/MM MD simulations.

| Molecular Label <sup>a</sup> | Atomic Label <sup>a</sup> | WT             | E172Q          | E181Q          | Q329A          |
|------------------------------|---------------------------|----------------|----------------|----------------|----------------|
| <b>Sub</b>                   | <b>NE</b>                 | -0.31290       | -0.28172       | -0.22043       | -0.2659        |
|                              | <b>HE</b>                 | 0.30546        | 0.28319        | 0.24919        | 0.28652        |
|                              | <b>CZ</b>                 | 0.52443        | 0.49332        | 0.47848        | 0.52305        |
|                              | <b>N<sub>η1</sub></b>     | -0.43220       | -0.40209       | -0.44412       | -0.44635       |
|                              | <b>HH11</b>               | 0.25114        | 0.28364        | 0.34175        | 0.32138        |
|                              | <b>HH12</b>               | 0.30188        | 0.27575        | 0.30072        | 0.23625        |
|                              | <b>N<sub>η2</sub></b>     | -0.51577       | -0.38762       | -0.45007       | -0.50241       |
|                              | <b>HH21</b>               | 0.27439        | 0.27219        | 0.29295        | 0.31202        |
|                              | <b>HH22</b>               | 0.32841        | 0.30243        | 0.25216        | 0.28058        |
| <b>Guanidino group</b>       |                           | <b>0.72484</b> | <b>0.83909</b> | <b>0.80063</b> | <b>0.74514</b> |

**Table S2.** Comparison of the Mulliken charge distributions (unit: e) in four small model systems (see the structures in Figure S2) based on the HF/STO-3G calculations.

| Molecular Label <sup>a</sup> | Atomic Label <sup>a</sup> | WT        | E172Q     | E181Q     | Q329A     | Molecular Label <sup>a</sup> | Atomic Label <sup>a</sup> | WT        | E172Q     | E181Q     | Q329A     |
|------------------------------|---------------------------|-----------|-----------|-----------|-----------|------------------------------|---------------------------|-----------|-----------|-----------|-----------|
| SAM                          | S <sub>8</sub>            | 0.493803  | 0.502782  | 0.531077  | 0.491074  | Sub                          | N <sub>n1</sub>           | -0.44103  | -0.415399 | -0.428612 | -0.441866 |
|                              | C <sub>M</sub>            | -0.223326 | -0.214754 | -0.248886 | -0.217716 |                              | HH11                      | 0.290791  | 0.247571  | 0.30255   | 0.280349  |
|                              | HM1                       | 0.117354  | 0.139674  | 0.140417  | 0.139219  |                              | HH12                      | 0.220625  | 0.255683  | 0.289871  | 0.223503  |
|                              | HM2                       | 0.165463  | 0.132322  | 0.140074  | 0.123448  |                              | N <sub>n2</sub>           | -0.451915 | -0.425013 | -0.430493 | -0.452757 |
|                              | HM3                       | 0.140551  | 0.110346  | 0.134358  | 0.149334  |                              | HH21                      | 0.26869   | 0.236899  | 0.309891  | 0.277465  |
|                              | CG                        | -0.22792  | -0.22026  | -0.240321 | -0.239485 |                              | HH22                      | 0.25819   | 0.305989  | 0.221683  | 0.257363  |
|                              | HG1                       | 0.12633   | 0.145203  | 0.128426  | 0.12731   |                              | CZ                        | 0.431032  | 0.451305  | 0.456944  | 0.436781  |
|                              | HG2                       | 0.123034  | 0.113907  | 0.126665  | 0.117441  |                              | NE                        | -0.365891 | -0.349418 | -0.345345 | -0.363625 |
|                              | HG3                       | 0.11446   | 0.132871  | 0.14221   | 0.122798  |                              | HE                        | 0.282187  | 0.291359  | 0.235998  | 0.29329   |
|                              | C5'                       | -0.230397 | -0.2352   | -0.254022 | -0.215606 |                              | CD                        | -0.067659 | -0.064206 | -0.06241  | -0.06724  |
|                              | H5'1                      | 0.120141  | 0.138554  | 0.124464  | 0.113092  |                              | HD1                       | 0.078034  | 0.065596  | 0.085845  | 0.062732  |
|                              | H5'2                      | 0.142819  | 0.120952  | 0.127732  | 0.152672  |                              | HD2                       | 0.075806  | 0.072694  | 0.08996   | 0.070117  |
|                              | H5'3                      | 0.126262  | 0.132352  | 0.133563  | 0.120414  |                              | HD3                       | 0.097543  | 0.10889   | 0.09718   | 0.112263  |
| Sum                          |                           | 0.988574  | 0.998749  | 0.985757  | 0.983995  | Sum                          |                           | 0.676403  | 0.78195   | 0.823062  | 0.688375  |
|                              |                           |           |           |           |           | Guanidine group              |                           | 0.492679  | 0.598976  | 0.612487  | 0.510503  |

a) See the structure Figure S2.

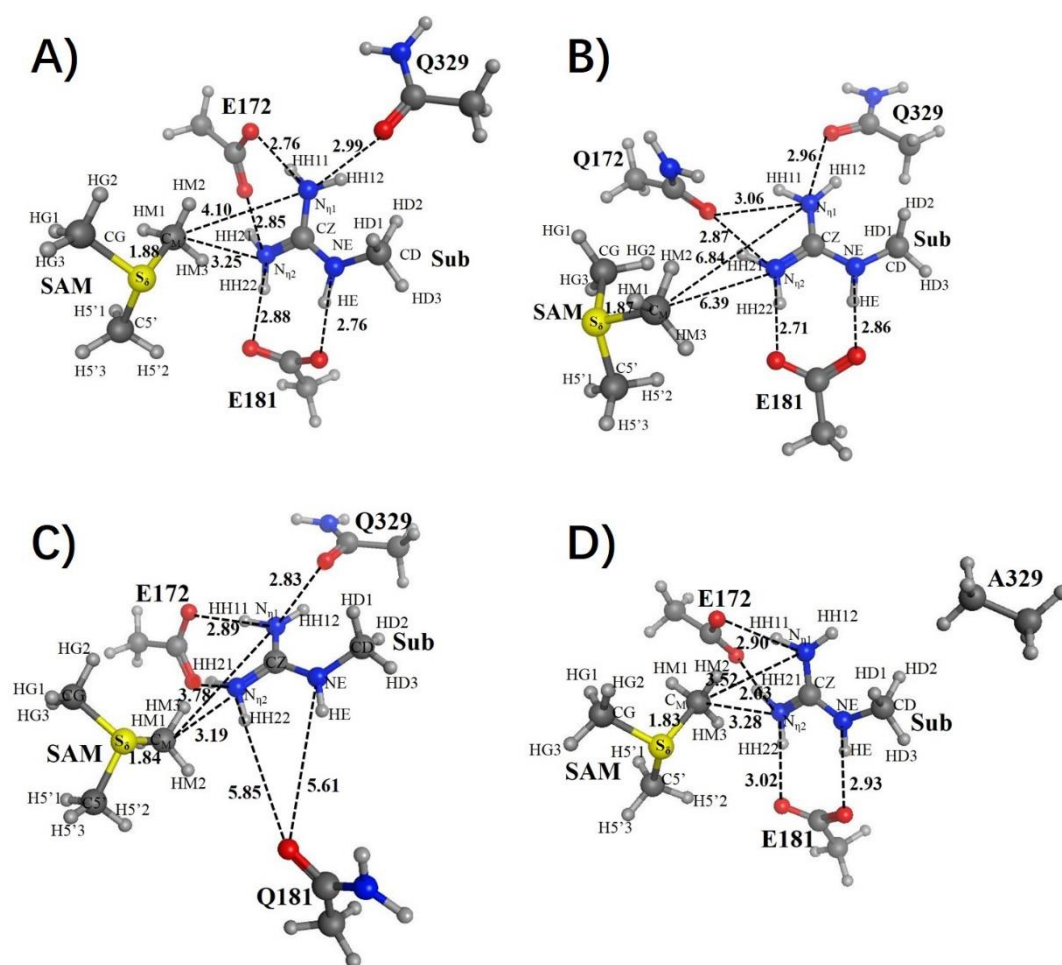

**Figure S2.** The cluster models of (A) wild-type PRMT7, (B) E172Q, (C) E181Q and (D) Q329A. For each cluster model, the representative active-site structures and key residues were based on the structures from QM/MM molecular dynamics simulations.

The representative active-site structures for the reactant state and near transition state as well as the free energy profiles for the 2<sup>nd</sup> methylations

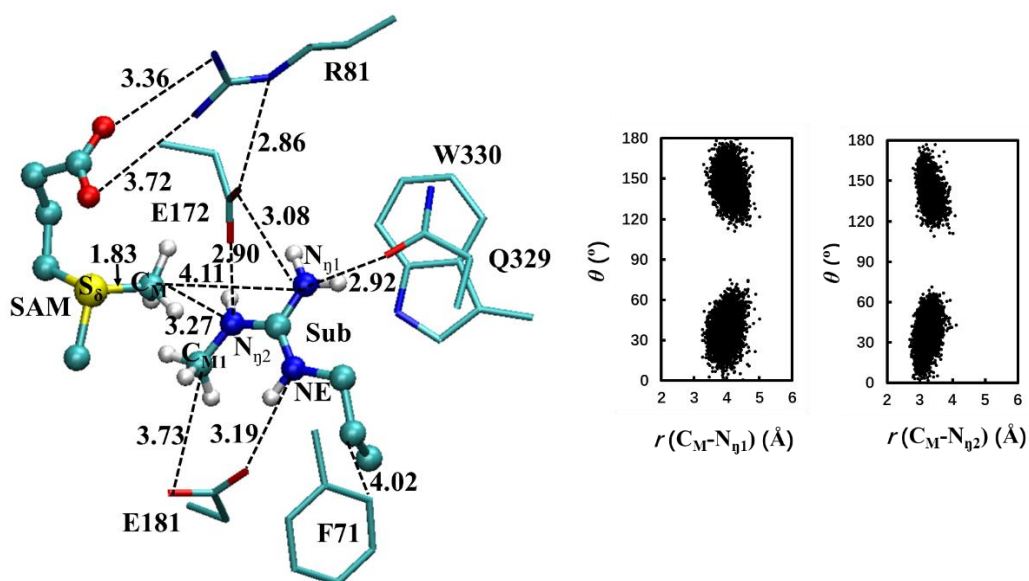

**Figure S3.** Representative active site structure of the reactant complex I for 2<sup>nd</sup> methylation along with  $r(\text{C}_M\cdots\text{N}_\eta)$  and  $\theta$  distributions obtained from the QM/MM simulation. (left) 2<sup>nd</sup> methylation on N<sub>η1</sub>. (right) 2<sup>nd</sup> methylation on N<sub>η2</sub>.

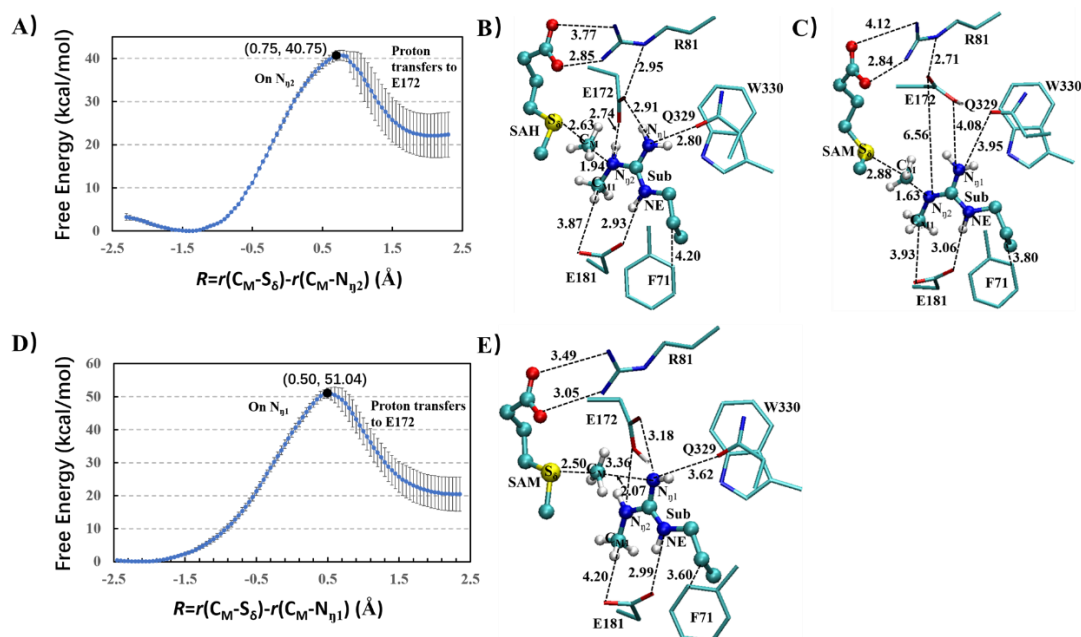

**Figure S4.** (A) Free energy profile for the 2<sup>nd</sup> methylation to N<sub>η2</sub> in complex I. (B) Representative active site structures of near TS for the 2<sup>nd</sup> methylation to N<sub>η2</sub> obtained from the free energy simulations. (C) Representative active site structures of (TS+1) state for the 2<sup>nd</sup> methylation to N<sub>η2</sub> as well as the proton transfer to E172. (D) Free energy profile for the 2<sup>nd</sup> methylation to N<sub>η1</sub>. (E) Representative active site structures of near TS for the 2<sup>nd</sup> methylation to N<sub>η1</sub> as well as the proton transfer to E172.



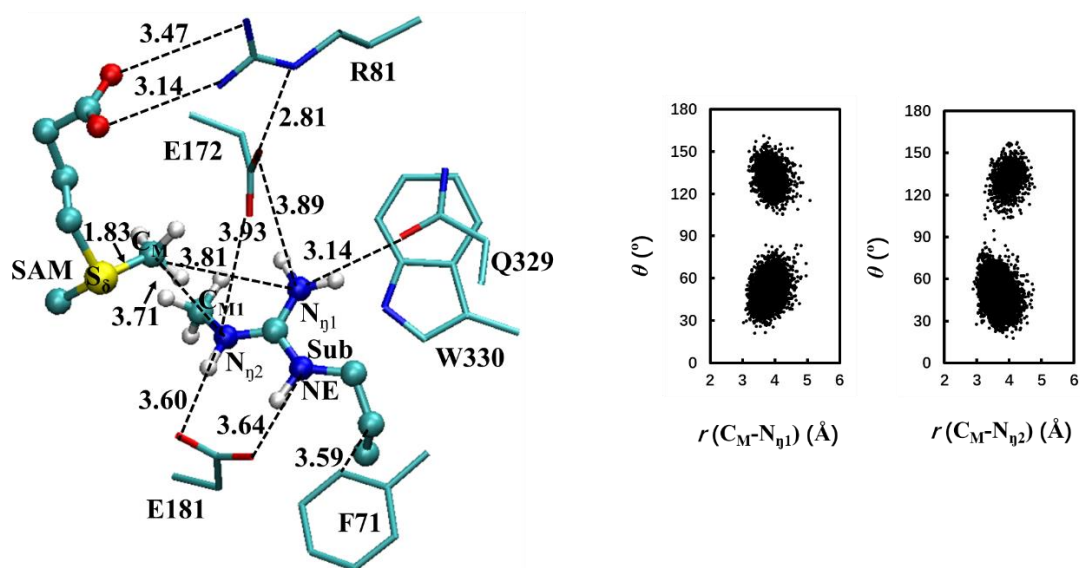

**Figure S5.** Representative active site structure of the reactant complex II for 2<sup>nd</sup> methylation along with  $r(C_M \cdots N_{\eta})$  and  $\theta$  distributions obtained from the QM/MM simulation. (left) 2<sup>nd</sup> methylation on N<sub>η1</sub>. (right) 2<sup>nd</sup> methylation on N<sub>η2</sub>.

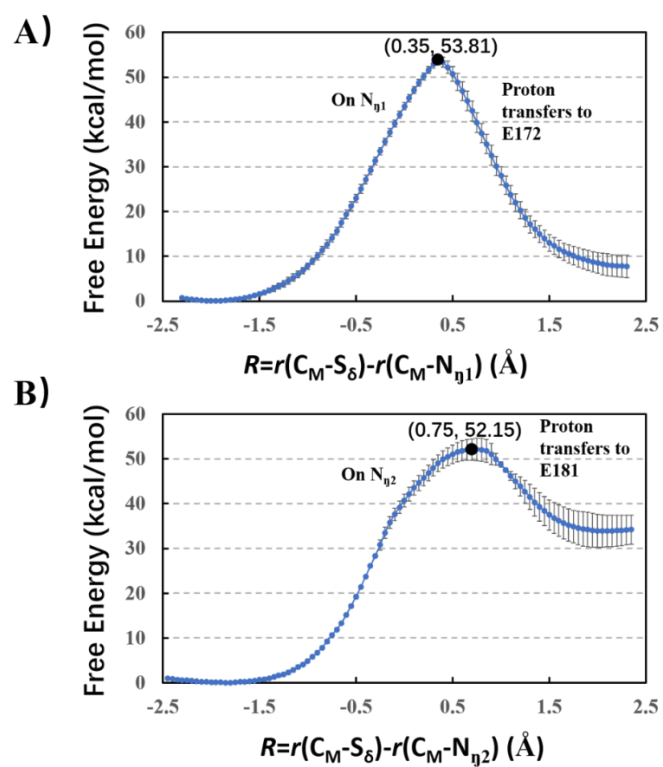

**Figure S6.** Free energy profile for the 2<sup>nd</sup> methylation addition to (A) the  $N_{\eta 1}$  atom and (B) the  $N_{\eta 2}$  atom in complex II.



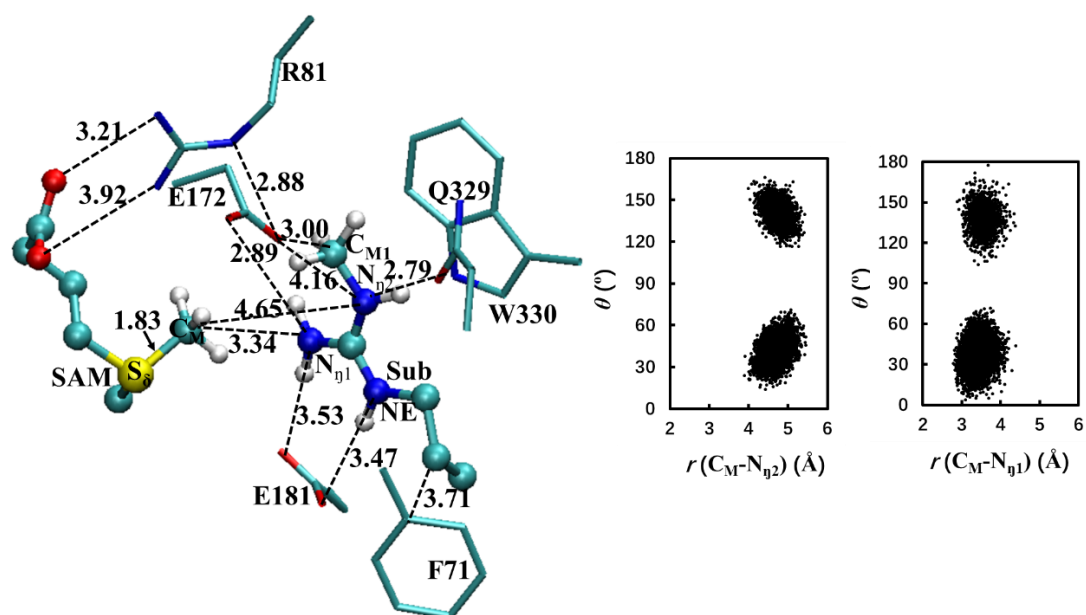

**Figure S8.** Representative active site structure of the reactant complex III for 2<sup>nd</sup> methylation along with  $r(C_M \cdots N_\eta)$  and  $\theta$  distributions obtained from the QM/MM simulation. (left) 2<sup>nd</sup> methylation on N<sub>η2</sub>. (right) 2<sup>nd</sup> methylation on N<sub>η1</sub>.

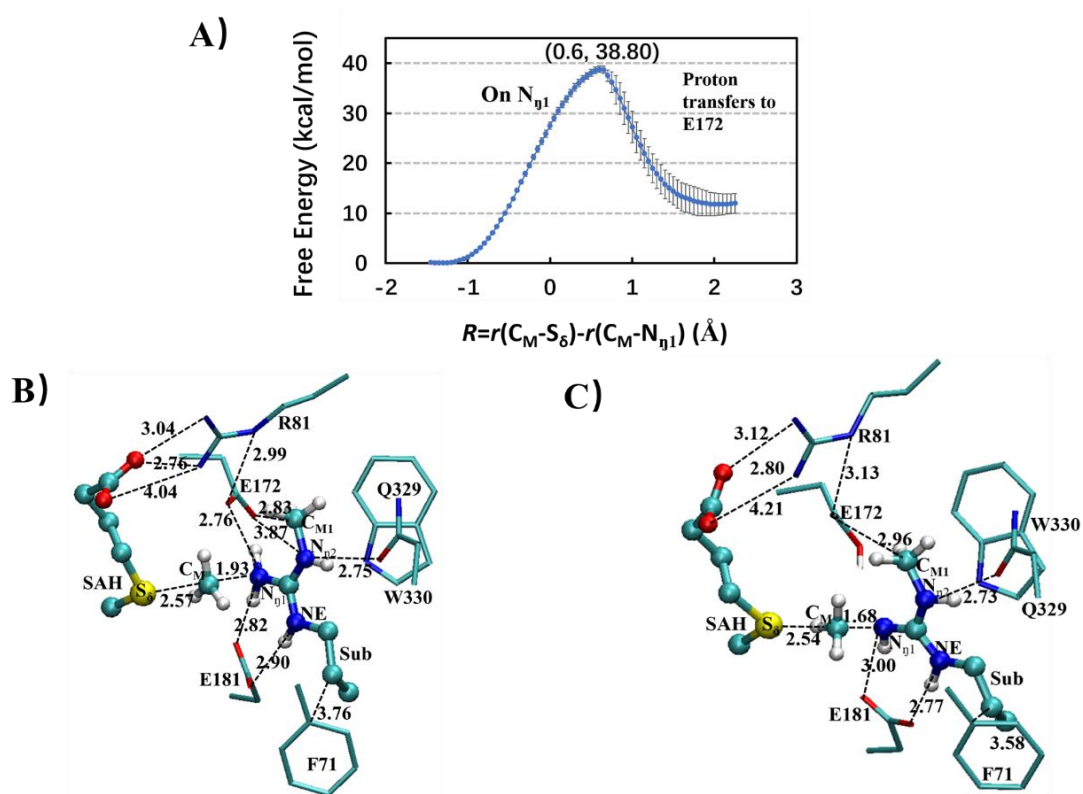

**Figure S9.** (A) Free energy profile for the 2<sup>nd</sup> methylation to  $N_{\eta1}$  in complex III. (B) Representative active site structures of near TS for the 2<sup>nd</sup> methylation to  $N_{\eta1}$  in complex III obtained from the free energy simulations. (C) Representative active site structures of (TS+2) state for the 2<sup>nd</sup> methylation to  $N_{\eta1}$  in complex III obtained from the free energy simulations.

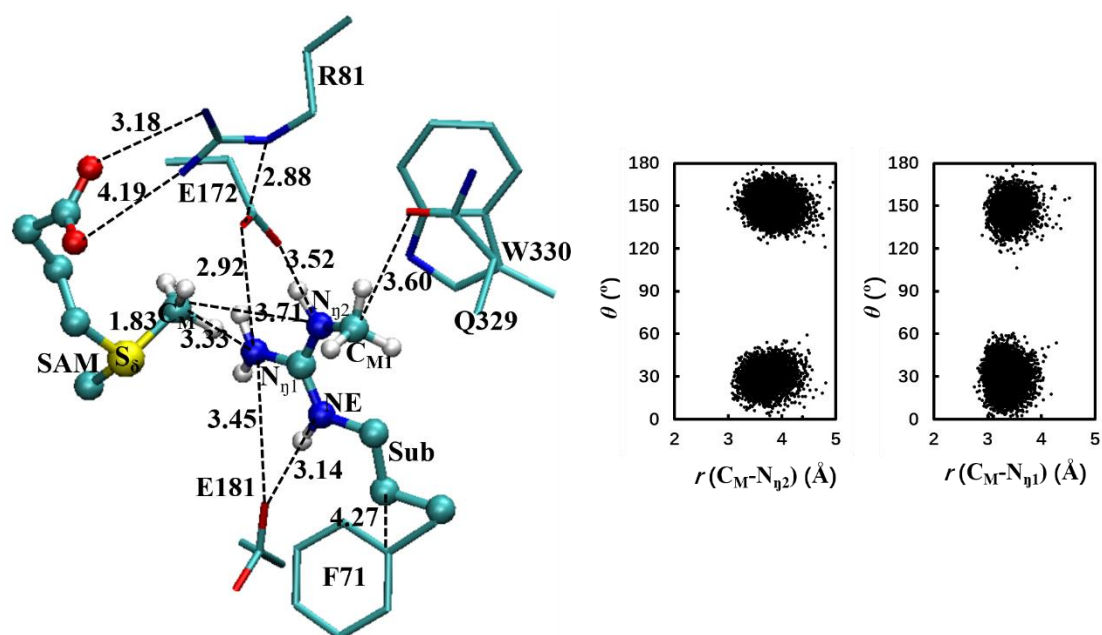

**Figure S10.** Representative active site structure of the reactant complex IV for 2<sup>nd</sup> methylation along with  $r(\text{C}_M \cdots \text{N}_{\eta})$  and  $\theta$  distributions obtained from the QM/MM simulation. (left) 2<sup>nd</sup> methylation on N<sub>η2</sub>. (right) 2<sup>nd</sup> methylation on N<sub>η1</sub>.

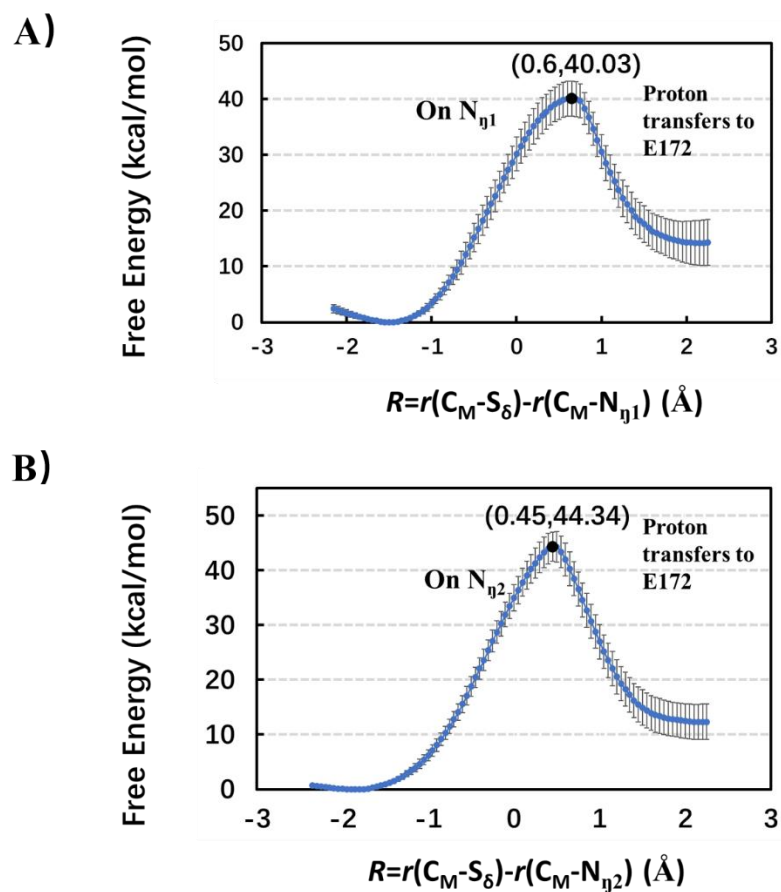

**Figure S11.** (A) Free energy profile for the 2<sup>nd</sup> methylation to  $N_{\eta 1}$  in complex IV. (B) Free energy profile for the 2<sup>nd</sup> methylation to  $N_{\eta 2}$  in complex IV.

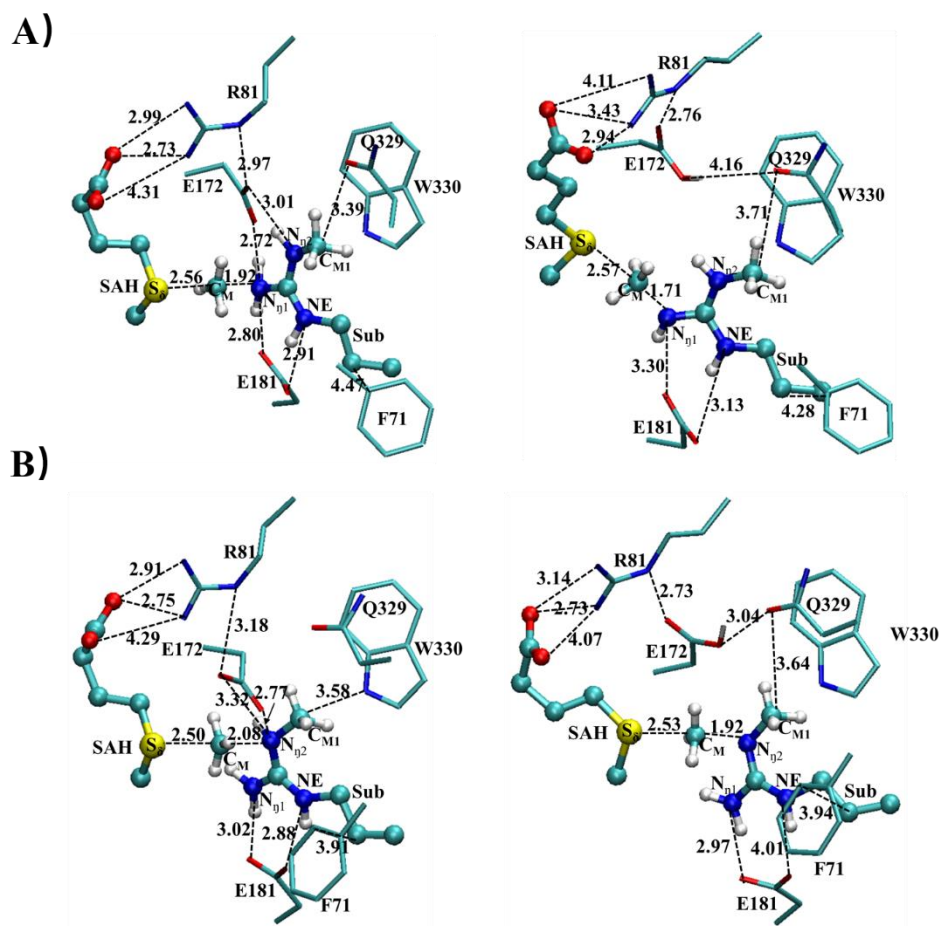

**Figure S12.** (A) Representative active site structures of near TS for the 2<sup>nd</sup> methylation to N<sub>η1</sub> in complex IV obtained from the free energy simulations. (B) Representative active site structures of (TS+1) state for the 2<sup>nd</sup> methylation to N<sub>η1</sub> in complex IV obtained from the free energy simulations. (C) Representative active site structures of near TS for the 2<sup>nd</sup> methylation to N<sub>η2</sub> in complex IV obtained from the free energy simulations. (D) Representative active site structures of (TS+2) state for the 2<sup>nd</sup> methylation to N<sub>η2</sub> in complex IV obtained from the free energy simulations.
